# Supplementary material
Source: PubMed Central journal article supplement (PMC9486642)
Supplement: jamapediatr-e223261-s001.pdf [file jamapediatr-e223261-s001.pdf]

## Supplemental Online Content

Walsh PS, Schnadower D, Zhang Y, Ramgopal S, Shah SS, Wilson PM. Association of early oseltamivir with improved outcomes in hospitalized children with influenza, 2007-2020. *JAMA Pediatr*. Published online September 19, 2022. doi:10.1001/jamapediatrics.2022.3261

**eTable 1.** Covariate distributions in unweighted and propensity score weighted samples.

**eTable 2.** Characteristics of children treated with early, late, and no oseltamivir during hospitalization.

**eTable 3.** Covariate distributions in weighted cohort by age group

**eTable 4.** Covariate distributions in weighted cohort by presence of a complex chronic condition

**eTable 5.** Covariate distributions in weighted cohort by asthma history

**eTable 6.** Covariate distributions in weighted cohort by early ICU requirement

**eFigure 1.** Love plot of standardized mean differences of covariates for unweighted and IPTW cohort in the primary analysis.

**eFigure 2.** Distributions of propensity scores for treatment with early oseltamivir.

**eFigure 3.** Results of covariate-adjusted mixed effects models of oseltamivir use and outcomes.

This supplemental material has been provided by the authors to give readers additional information about their work.

**eTable 1:** Covariate Distributions in Unweighted and Propensity Score Weighted Samples

| Covariates Distributions in Unweighted and PS Weighted Samples |                      |                   |                      |                   |
|----------------------------------------------------------------|----------------------|-------------------|----------------------|-------------------|
| Characteristics                                                | Unweighted Samples   |                   | PS Weighted Samples  |                   |
|                                                                | No Early Oseltamivir | Early Oseltamivir | No Early Oseltamivir | Early Oseltamivir |
| <b>Age</b>                                                     |                      |                   |                      |                   |
| < 2                                                            | 41.0% (9258)         | 35.0% (11624)     | 33.7% (11190)        | 35.0% (11624)     |
| 2 - 5                                                          | 21.0% (4755)         | 20.5% (6806)      | 20.8% (6903)         | 20.5% (6806)      |
| ≥ 5                                                            | 38.0% (8579)         | 44.5% (14777)     | 45.5% (15113)        | 44.5% (14777)     |
| <b>Race</b>                                                    |                      |                   |                      |                   |
| Black                                                          | 22.1% (5000)         | 25.1% (8336)      | 24.8% (8220)         | 25.1% (8336)      |
| White                                                          | 54.2% (12245)        | 49.6% (16461)     | 49.9% (16577)        | 49.6% (16461)     |
| Other                                                          | 18.4% (4150)         | 20.4% (6782)      | 20.3% (6756)         | 20.4% (6782)      |
| Unknown                                                        | 5.3% (1197)          | 4.9% (1628)       | 5.0% (1654)          | 4.9% (1628)       |
| <b>Insurance</b>                                               |                      |                   |                      |                   |
| Public                                                         | 61.4% (13872)        | 64.6% (21466)     | 64.5% (21403)        | 64.6% (21466)     |
| Private                                                        | 32.2% (7279)         | 30.8% (10225)     | 31.1% (10341)        | 30.8% (10225)     |
| Other                                                          | 4.4% (1003)          | 3.1% (1041)       | 3.1% (1036)          | 3.1% (1041)       |
| Unknown                                                        | 1.9% (438)           | 1.4% (475)        | 1.3% (428)           | 1.4% (475)        |
| <b>CCC</b>                                                     |                      |                   |                      |                   |
| CCC, Yes                                                       | 46.8% (10581)        | 48.1% (15979)     | 48.7% (16171)        | 48.1% (15979)     |
| <b>Asthma</b>                                                  |                      |                   |                      |                   |
| Asthma, Yes                                                    | 9.4% (2118)          | 12.6% (4170)      | 12.2% (4050)         | 12.6% (4170)      |
| <b>Early ICU</b>                                               |                      |                   |                      |                   |
| Early ICU, Yes                                                 | 24.0% (5429)         | 28.9% (9610)      | 28.1% (9347)         | 28.9% (9610)      |
| <b>Ventilation</b>                                             |                      |                   |                      |                   |
| Ventilation, Yes                                               | 13.4% (3032)         | 17.6% (5846)      | 17.0% (5633)         | 17.6% (5846)      |
| <b>Early Antibiotic</b>                                        |                      |                   |                      |                   |
| Early Antibiotic, Yes                                          | 65.4% (14764)        | 67.8% (22527)     | 68.2% (22640)        | 67.8% (22527)     |

Abbreviations: CCC, complex chronic condition; ICU, intensive care unit.

\*Other includes those identified as other, Asian, American Indian/Alaskan/Native American, or NativeHawaiian/Pacific Islander.

**eTable 2:** Characteristics of children treated with early, late, and no oseltamivir during hospitalization.

| Characteristic             | No Oseltamivir | Late Oseltamivir | Early Oseltamivir |
|----------------------------|----------------|------------------|-------------------|
| Number                     | 18,494         | 4,098            | 33,207            |
| Age Categories             |                |                  |                   |
| < 2                        | 8027 (43.4)    | 1231 (30.0)      | 11624 (35.0)      |
| 2 - 5                      | 3853 (20.8)    | 902 (22.0)       | 6806 (20.5)       |
| ≥ 5                        | 6614 (35.8)    | 1965 (48.0)      | 14777 (44.5)      |
| Gender                     |                |                  |                   |
| Male                       | 10337 (55.9)   | 2254 (55.0)      | 18715 (56.4)      |
| Female                     | 8153 (44.1)    | 1842 (44.9)      | 14491 (43.6)      |
| Race                       |                |                  |                   |
| Black                      | 4021 (21.7)    | 979 (23.9)       | 8336 (25.1)       |
| White                      | 10214 (55.2)   | 2031 (49.6)      | 16461 (49.6)      |
| Other                      | 3243 (17.5)    | 907 (22.1)       | 6782 (20.4)       |
| Unknown                    | 1016 (5.5)     | 181 (4.4)        | 1628 (4.9)        |
| Insurance Type             |                |                  |                   |
| Public                     | 11278 (61.0)   | 2594 (63.3)      | 21466 (64.6)      |
| Private                    | 6093 (32.9)    | 1186 (28.9)      | 10225 (30.8)      |
| Other                      | 846 (4.6)      | 157 (3.8)        | 1041 (3.1)        |
| Unknown                    | 277 (1.5)      | 161 (3.9)        | 475 (1.4)         |
| Region                     |                |                  |                   |
| Midwest                    | 4352 (23.5)    | 919 (22.4)       | 8082 (24.3)       |
| Northeast                  | 1992 (10.8)    | 456 (11.1)       | 3237 (9.7)        |
| South                      | 7988 (43.2)    | 1582 (38.6)      | 12817 (38.6)      |
| West                       | 4162 (22.5)    | 1141 (27.8)      | 9071 (27.3)       |
| CCC                        |                |                  |                   |
| No                         | 10704 (57.9)   | 1307 (31.9)      | 17228 (51.9)      |
| Yes                        | 7790 (42.1)    | 2791 (68.1)      | 15979 (48.1)      |
| History of Asthma (no CCC) |                |                  |                   |
| No                         | 16643 (90.0)   | 3831 (93.5)      | 29037 (87.4)      |
| Yes                        | 1851 (10.0)    | 267 (6.5)        | 4170 (12.6)       |
| Early ICU                  |                |                  |                   |
| No                         | 14263 (77.1)   | 2900 (70.8)      | 23597 (71.1)      |
| Yes                        | 4231 (22.9)    | 1198 (29.2)      | 9610 (28.9)       |

Abbreviations: CCC, complex chronic condition; ICU, intensive care unit.

\*Other includes those identified as other, Asian, American Indian/Alaskan/Native American, or NativeHawaiian/Pacific Islander.

**eTable 3: Covariate Distributions in Weighted Cohort by Age Group**

| <b>Covariate Distributions in Weighted Cohort by Age Group</b> |                       |                             |                          |
|----------------------------------------------------------------|-----------------------|-----------------------------|--------------------------|
| <b>Group/Covariates</b>                                        | <b>Categories</b>     | <b>No Early Oseltamivir</b> | <b>Early Oseltamivir</b> |
| <b>Age: &lt; 2</b>                                             |                       |                             |                          |
| Race                                                           | Black                 | 25.7% (2881)                | 24.2% (2817)             |
|                                                                | White                 | 45.4% (5086)                | 46.6% (5419)             |
|                                                                | Other                 | 23.1% (2583)                | 22.9% (2667)             |
|                                                                | Unknown               | 5.7% (640)                  | 6.2% (721)               |
| Insurance                                                      | Public                | 72.5% (8112)                | 72.9% (8472)             |
|                                                                | Private               | 23.5% (2628)                | 23.0% (2675)             |
|                                                                | Other                 | 2.9% (322)                  | 2.7% (310)               |
|                                                                | Unknown               | 1.2% (129)                  | 1.4% (167)               |
| CCC                                                            | CCC, Yes              | 40.5% (4533)                | 33.2% (3854)             |
| Asthma                                                         | Asthma, Yes           | 6.4% (712)                  | 5.1% (597)               |
| Early ICU                                                      | Early ICU, Yes        | 35.2% (3941)                | 27.9% (3247)             |
| Ventilation                                                    | Ventilation, Yes      | 21.3% (2383)                | 17.0% (1975)             |
| Early Antibiotic                                               | Early Antibiotic, Yes | 67.0% (7498)                | 63.7% (7399)             |
| <b>Age: 2 - 5</b>                                              |                       |                             |                          |
| Race                                                           | Black                 | 24.9% (1717)                | 25.0% (1701)             |
|                                                                | White                 | 48.2% (3325)                | 49.7% (3382)             |
|                                                                | Other                 | 21.7% (1501)                | 20.5% (1392)             |
|                                                                | Unknown               | 5.2% (360)                  | 4.9% (331)               |
| Insurance                                                      | Public                | 65.7% (4536)                | 64.7% (4406)             |
|                                                                | Private               | 29.6% (2047)                | 30.1% (2047)             |
|                                                                | Other                 | 3.3% (225)                  | 3.6% (243)               |
|                                                                | Unknown               | 1.4% (95)                   | 1.6% (110)               |
| CCC                                                            | CCC, Yes              | 48.9% (3377)                | 50.6% (3442)             |
| Asthma                                                         | Asthma, Yes           | 14.9% (1030)                | 14.8% (1006)             |
| Early ICU                                                      | Early ICU, Yes        | 24.2% (1668)                | 27.8% (1891)             |
| Ventilation                                                    | Ventilation, Yes      | 14.5% (1003)                | 16.7% (1136)             |
| Early Antibiotic                                               | Early Antibiotic, Yes | 70.0% (4833)                | 68.6% (4666)             |
| <b>Age: ≥ 5</b>                                                |                       |                             |                          |
| Race                                                           | Black                 | 24.0% (3622)                | 25.8% (3818)             |
|                                                                | White                 | 54.0% (8165)                | 51.8% (7660)             |
|                                                                | Other                 | 17.7% (2672)                | 18.4% (2723)             |
|                                                                | Unknown               | 4.3% (654)                  | 3.9% (576)               |
| Insurance                                                      | Public                | 57.9% (8754)                | 58.1% (8588)             |
|                                                                | Private               | 37.5% (5667)                | 37.2% (5503)             |
|                                                                | Other                 | 3.2% (489)                  | 3.3% (488)               |
|                                                                | Unknown               | 1.3% (204)                  | 1.3% (198)               |
| CCC                                                            | CCC, Yes              | 54.7% (8261)                | 58.8% (8683)             |
| Asthma                                                         | Asthma, Yes           | 15.3% (2309)                | 17.4% (2567)             |
| Early ICU                                                      | Early ICU, Yes        | 24.7% (3737)                | 30.3% (4472)             |
| Ventilation                                                    | Ventilation, Yes      | 14.9% (2246)                | 18.5% (2735)             |
| Early Antibiotic                                               | Early Antibiotic, Yes | 68.2% (10308)               | 70.8% (10462)            |

Abbreviations: CCC, complex chronic condition; ICU, intensive care unit.

\*Other includes those identified as other, Asian, American Indian/Alaskan/Native American, or NativeHawaiian/Pacific Islander.

**eTable 4:** Covariate Distributions in Weighted Cohort by Presence of a Complex Chronic Condition

| <b>Covariate Distributions in Weighted Cohort by CCC</b> |                       |                             |                          |
|----------------------------------------------------------|-----------------------|-----------------------------|--------------------------|
| <b>Group/Covariates</b>                                  | <b>Categories</b>     | <b>No Early Oseltamivir</b> | <b>Early Oseltamivir</b> |
| <b>CCC: No</b>                                           |                       |                             |                          |
| Age                                                      | < 2                   | 39.1% (6657)                | 45.1% (7770)             |
|                                                          | 2 - 5                 | 20.7% (3526)                | 19.5% (3364)             |
|                                                          | ≥ 5                   | 40.2% (6853)                | 35.4% (6094)             |
| Race                                                     | Black                 | 24.7% (4203)                | 23.9% (4118)             |
|                                                          | White                 | 50.0% (8513)                | 49.2% (8477)             |
|                                                          | Other                 | 19.1% (3251)                | 20.7% (3558)             |
|                                                          | Unknown               | 6.3% (1069)                 | 6.2% (1075)              |
| Insurance                                                | Public                | 61.4% (10460)               | 62.7% (10807)            |
|                                                          | Private               | 33.7% (5741)                | 32.3% (5568)             |
|                                                          | Other                 | 3.6% (620)                  | 3.6% (614)               |
|                                                          | Unknown               | 1.3% (214)                  | 1.4% (239)               |
| Asthma                                                   | Asthma, Yes           | 23.8% (4050)                | 24.2% (4170)             |
| Early ICU                                                | Early ICU, Yes        | 21.8% (3721)                | 27.8% (4796)             |
| Ventilation                                              | Ventilation, Yes      | 11.9% (2033)                | 15.2% (2624)             |
| Early Antibiotic                                         | Early Antibiotic, Yes | 63.0% (10738)               | 61.1% (10524)            |
| <b>CCC: Yes</b>                                          |                       |                             |                          |
| Age                                                      | < 2                   | 28.0% (4533)                | 24.1% (3854)             |
|                                                          | 2 - 5                 | 20.9% (3377)                | 21.5% (3442)             |
|                                                          | ≥ 5                   | 51.1% (8261)                | 54.3% (8683)             |
| Race                                                     | Black                 | 24.8% (4018)                | 26.4% (4218)             |
|                                                          | White                 | 49.9% (8064)                | 50.0% (7984)             |
|                                                          | Other                 | 21.7% (3505)                | 20.2% (3224)             |
|                                                          | Unknown               | 3.6% (585)                  | 3.5% (553)               |
| Insurance                                                | Public                | 67.7% (10942)               | 66.7% (10659)            |
|                                                          | Private               | 28.4% (4600)                | 29.1% (4657)             |
|                                                          | Other                 | 2.6% (416)                  | 2.7% (427)               |
|                                                          | Unknown               | 1.3% (213)                  | 1.5% (236)               |
| Early ICU                                                | Early ICU, Yes        | 34.8% (5626)                | 30.1% (4814)             |
| Ventilation                                              | Ventilation, Yes      | 22.3% (3600)                | 20.2% (3222)             |
| Early Antibiotic                                         | Early Antibiotic, Yes | 73.6% (11902)               | 75.1% (12003)            |

Abbreviations: CCC, complex chronic condition; ICU, intensive care unit.

<sup>a</sup>Other includes those identified as other, Asian, American Indian/Alaskan/Native American, or NativeHawaiian/Pacific Islander.

**eTable 5: Covariate Distributions in Weighted Cohort by Asthma History**

| <b>Covariate Distributions in Weighted Cohort by Asthma History</b> |                       |                             |                          |
|---------------------------------------------------------------------|-----------------------|-----------------------------|--------------------------|
| <b>Group/Covariates</b>                                             | <b>Categories</b>     | <b>No Early Oseltamivir</b> | <b>Early Oseltamivir</b> |
| <b>History of Asthma: No</b>                                        |                       |                             |                          |
| Age                                                                 | < 2                   | 35.9% (10479)               | 38.0% (11027)            |
|                                                                     | 2 - 5                 | 20.1% (5873)                | 20.0% (5800)             |
|                                                                     | ≥ 5                   | 43.9% (12805)               | 42.0% (12210)            |
| Race                                                                | Black                 | 23.6% (6887)                | 23.9% (6941)             |
|                                                                     | White                 | 50.6% (14751)               | 50.5% (14651)            |
|                                                                     | Other                 | 21.0% (6119)                | 20.9% (6063)             |
|                                                                     | Unknown               | 4.8% (1399)                 | 4.8% (1382)              |
| Insurance                                                           | Public                | 64.7% (18855)               | 65.4% (18980)            |
|                                                                     | Private               | 30.9% (9016)                | 30.1% (8728)             |
|                                                                     | Other                 | 3.1% (904)                  | 3.1% (898)               |
|                                                                     | Unknown               | 1.3% (381)                  | 1.5% (431)               |
| CCC                                                                 | CCC, Yes              | 55.5% (16171)               | 55.0% (15979)            |
| Early ICU                                                           | Early ICU, Yes        | 28.7% (8374)                | 27.9% (8112)             |
| Ventilation                                                         | Ventilation, Yes      | 17.4% (5060)                | 17.1% (4976)             |
| Early Antibiotic                                                    | Early Antibiotic, Yes | 69.0% (20132)               | 69.5% (20187)            |
| <b>History of Asthma: Yes</b>                                       |                       |                             |                          |
| Age                                                                 | < 2                   | 17.6% (712)                 | 14.3% (597)              |
|                                                                     | 2 - 5                 | 25.4% (1030)                | 24.1% (1006)             |
|                                                                     | ≥ 5                   | 57.0% (2309)                | 61.6% (2567)             |
| Race                                                                | Black                 | 32.9% (1333)                | 33.5% (1395)             |
|                                                                     | White                 | 45.1% (1826)                | 43.4% (1810)             |
|                                                                     | Other                 | 15.7% (637)                 | 17.2% (719)              |
|                                                                     | Unknown               | 6.3% (255)                  | 5.9% (246)               |
| Insurance                                                           | Public                | 62.9% (2548)                | 59.6% (2486)             |
|                                                                     | Private               | 32.7% (1325)                | 35.9% (1497)             |
|                                                                     | Other                 | 3.3% (132)                  | 3.4% (143)               |
|                                                                     | Unknown               | 1.1% (46)                   | 1.1% (44)                |
| Early ICU                                                           | Early ICU, Yes        | 24.0% (972)                 | 35.9% (1498)             |
| Ventilation                                                         | Ventilation, Yes      | 14.1% (572)                 | 20.9% (870)              |
| Early Antibiotic                                                    | Early Antibiotic, Yes | 61.9% (2508)                | 56.1% (2340)             |

Abbreviations: CCC, complex chronic condition; ICU, intensive care unit.

\*Other includes those identified as other, Asian, American Indian/Alaskan/Native American, or Native Hawaiian/Pacific Islander.

**eTable 6:** Covariate distributions in weighted cohort by early ICU requirement

| Covariate Distributions in Weighted Cohort by Early ICU |                       |                      |                   |
|---------------------------------------------------------|-----------------------|----------------------|-------------------|
| Group/Covariates                                        | Categories            | No Early Oseltamivir | Early Oseltamivir |
| <b>Early ICU: No</b>                                    |                       |                      |                   |
| Age                                                     | < 2                   | 30.4% (7250)         | 35.5% (8377)      |
|                                                         | 2 - 5                 | 21.9% (5235)         | 20.8% (4915)      |
|                                                         | ≥ 5                   | 47.7% (11376)        | 43.7% (10305)     |
| Race                                                    | Black                 | 24.5% (5834)         | 25.9% (6103)      |
|                                                         | White                 | 50.3% (12004)        | 48.3% (11399)     |
|                                                         | Other                 | 20.1% (4788)         | 20.9% (4928)      |
|                                                         | Unknown               | 5.2% (1235)          | 4.9% (1167)       |
| Insurance                                               | Public                | 63.2% (15089)        | 65.6% (15486)     |
|                                                         | Private               | 32.2% (7680)         | 29.9% (7051)      |
|                                                         | Other                 | 3.3% (780)           | 3.0% (714)        |
|                                                         | Unknown               | 1.3% (312)           | 1.5% (346)        |
| CCC                                                     | CCC, Yes              | 44.2% (10545)        | 47.3% (11165)     |
| Asthma                                                  | Asthma, Yes           | 12.9% (3078)         | 11.3% (2672)      |
| Ventilation                                             | Ventilation, Yes      | 3.6% (853)           | 3.8% (900)        |
| Early Antibiotic                                        | Early Antibiotic, Yes | 64.7% (15440)        | 64.7% (15273)     |
| <b>Early ICU: Yes</b>                                   |                       |                      |                   |
| Age                                                     | < 2                   | 42.2% (3941)         | 33.8% (3247)      |
|                                                         | 2 - 5                 | 17.8% (1668)         | 19.7% (1891)      |
|                                                         | ≥ 5                   | 40.0% (3737)         | 46.5% (4472)      |
| Race                                                    | White                 | 48.9% (4573)         | 52.7% (5062)      |
|                                                         | Black                 | 25.5% (2386)         | 23.2% (2233)      |
|                                                         | Other                 | 21.1% (1968)         | 19.3% (1854)      |
|                                                         | Unknown               | 4.5% (419)           | 4.8% (461)        |
| Insurance                                               | Public                | 67.5% (6314)         | 62.2% (5980)      |
|                                                         | Private               | 28.5% (2661)         | 33.0% (3174)      |
|                                                         | Other                 | 2.7% (256)           | 3.4% (327)        |
|                                                         | Unknown               | 1.2% (116)           | 1.3% (129)        |
| CCC                                                     | CCC, Yes              | 60.2% (5626)         | 50.1% (4814)      |
| Asthma                                                  | Asthma, Yes           | 10.4% (972)          | 15.6% (1498)      |
| Ventilation                                             | Ventilation, Yes      | 51.1% (4780)         | 51.5% (4946)      |
| Early Antibiotic                                        | Early Antibiotic, Yes | 77.0% (7199)         | 75.5% (7254)      |

Abbreviations: CCC, complex chronic condition; ICU, intensive care unit.

\*Other includes those identified as other, Asian, American Indian/Alaskan/Native American, or Native Hawaiian/Pacific Islander.

**eFigure 1:** Love plot of standardized mean differences of covariates for unweighted and IPTW cohort in the primary analysis.

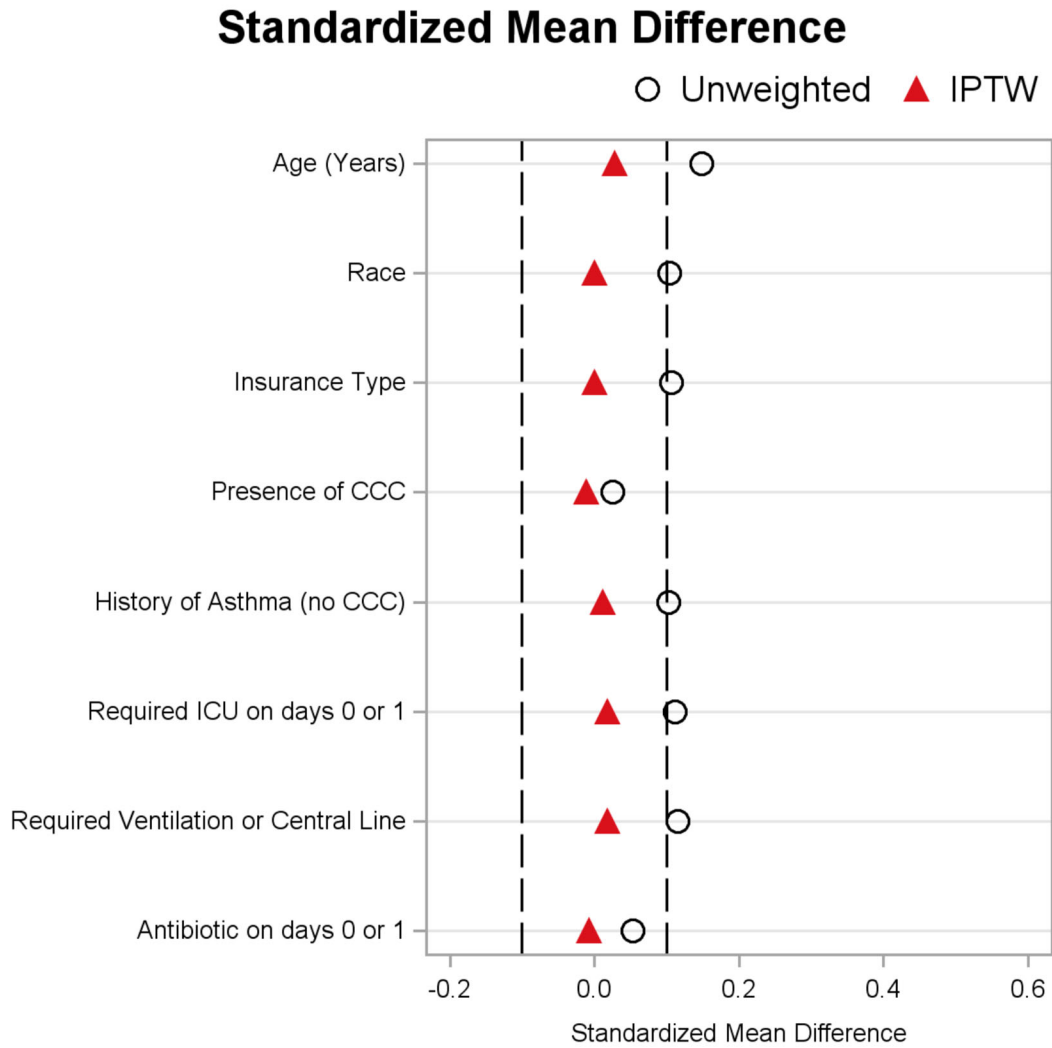

IPTW, inverse probability treatment weighting; CCC, complex chronic condition; ICU, intensive care unit.



**eFigure 2:** Distributions of propensity scores for treatment with early oseltamivir.

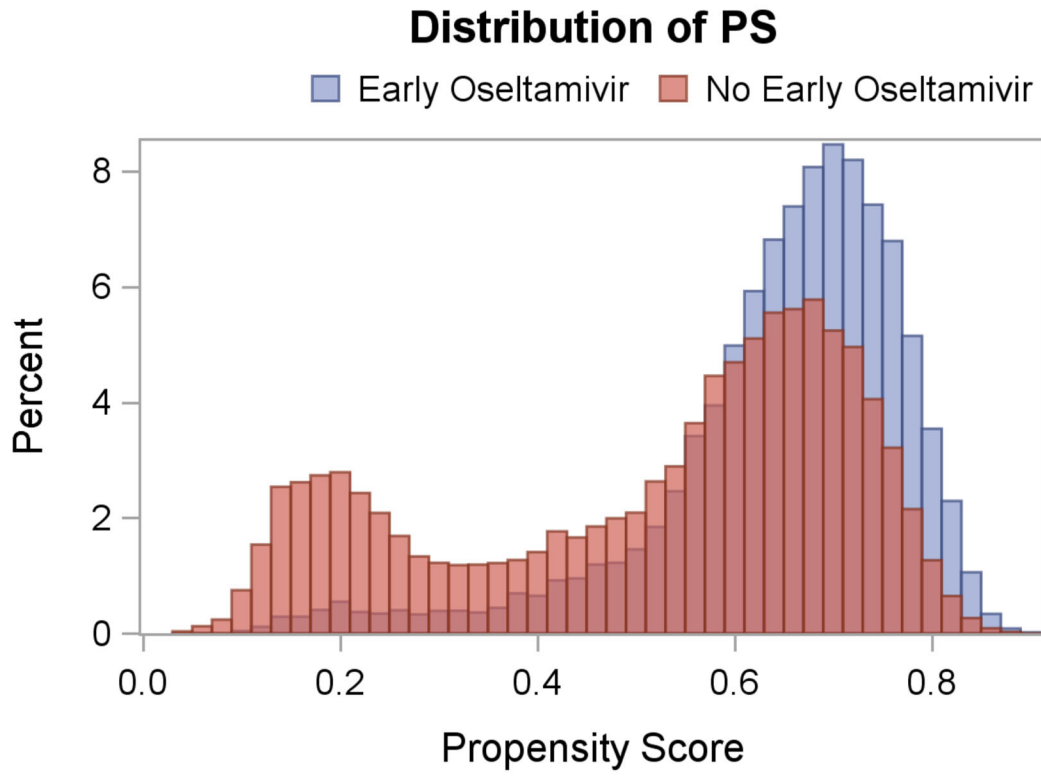

**eFigure 3:** Results of covariate-adjusted mixed effects models of oseltamivir use and outcomes.

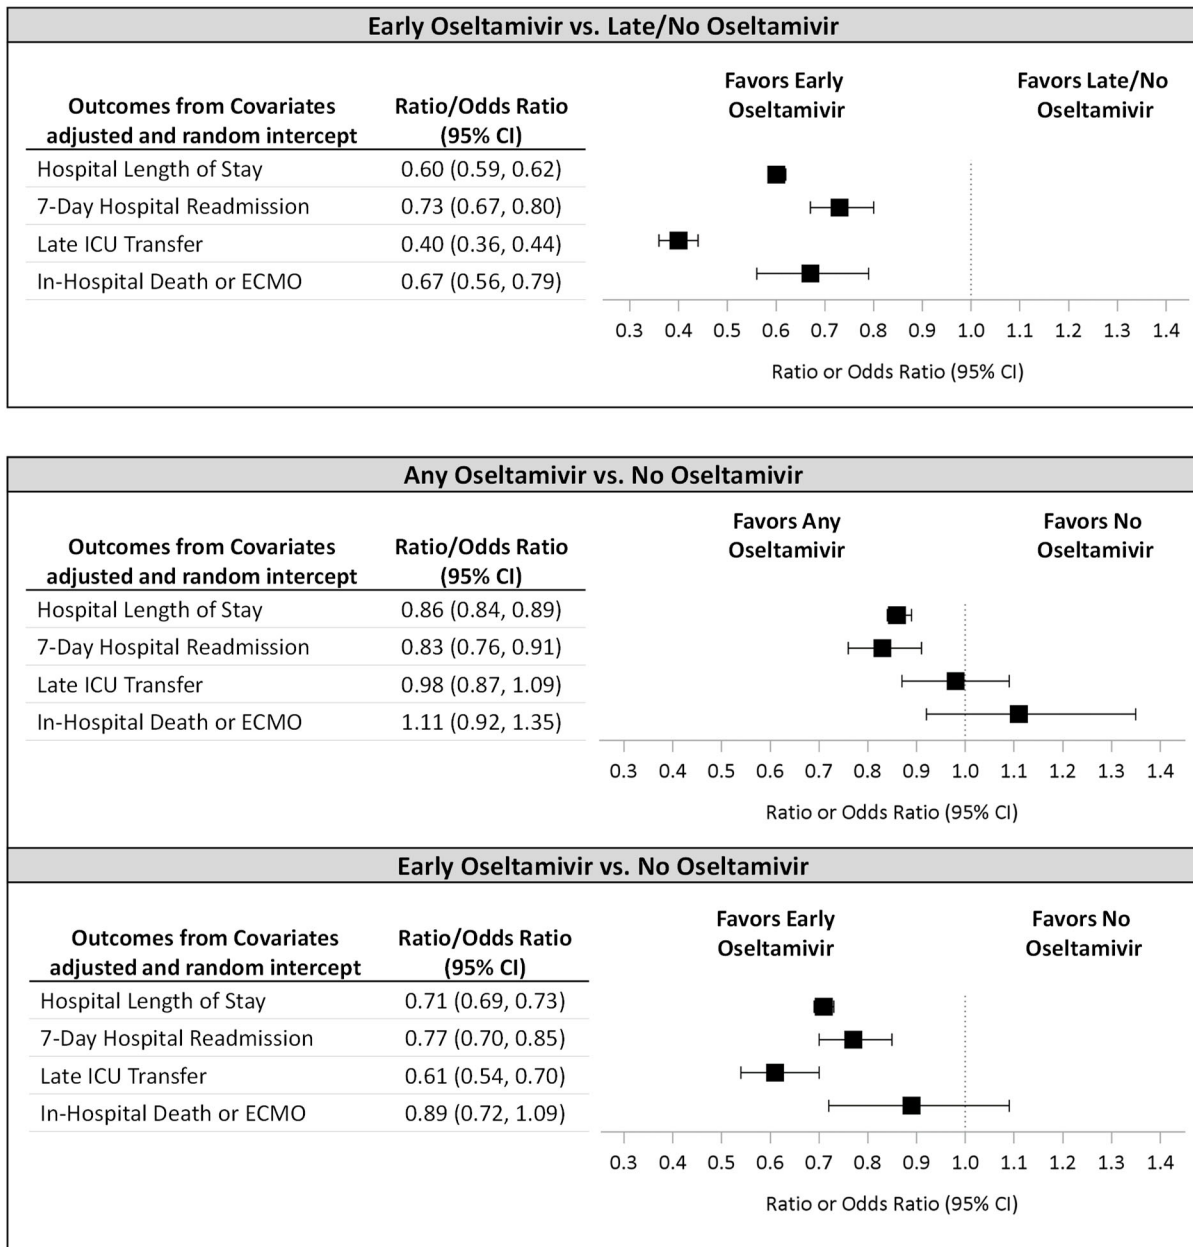

Upper panel: Analysis of early oseltamivir compared to no early oseltamivir.

Lower panel: Analyses of any oseltamivir treatment vs. none and early oseltamivir vs. none (excluding late oseltamivir).
